# Supplementary material for: Synthesis and characterization of an octanuclear copper(i) methanediide cluster
Source: Royal Society of Chemistry journal article supplement (doi:10.1039/c3dt52833b), 2013-10-18
Supplement: c3dt52833b.pdf [file c3dt52833b.pdf]

## **Supplementary Material**

### **Synthesis and Characterization of an Octanuclear Copper(I)**

#### **Methanediide Cluster**

*Wing-Por Leung,\* Yuk-Chi Chan and Thomas C. W. Mak*

Department of Chemistry, The Chinese University of Hong Kong, Shatin, New Territories, Hong Kong, China

E-mail: kevinleung@cuhk.edu.hk.

Fax: +852 2609 5057.

#### **The Supplementary Material contains:**

1. Experimental Section
2. X-ray crystallographic data for compound **3**
3. Selected bond distances and angles for compound **3**
4. Absorption, emission and excitation spectra of compound **3**

## Experimental Section

**General procedures.** All manipulations were carried out under an inert atmosphere of dinitrogen gas by standard Schlenk techniques. Solvents were dried over and distilled from Na (Et<sub>2</sub>O and THF). [K{CH(<sup>i</sup>Pr<sub>2</sub>P-S)(C<sub>9</sub>H<sub>6</sub>N-2)}]<sub>n</sub> was prepared according to the literature procedures.<sup>1</sup> CuCl was purchased from Aldrich Chemical Co. and used without further purification. The <sup>1</sup>H, <sup>13</sup>C{<sup>1</sup>H} and <sup>31</sup>P{<sup>1</sup>H} spectra were recorded on Bruker 400 spectrometer. The NMR spectra were recorded in C<sub>6</sub>D<sub>6</sub>, and the chemical shift are relative to SiMe<sub>4</sub> for <sup>1</sup>H and <sup>13</sup>C{<sup>1</sup>H} and 85% H<sub>3</sub>PO<sub>4</sub> for <sup>31</sup>P{<sup>1</sup>H}, respectively.

### Synthesis of **3**

A solution of **1** (1.04 g, 3.16 mmol) in THF (30ml) was added to a solution of CuCl (0.31 g, 3.13 mmol) in THF (10ml) at 0 °C. The reaction mixture was stirred at room temperature for 12 hr and red mixture was formed. All the volatiles in the reaction mixture were removed under reduced pressure and the residue was extracted with Et<sub>2</sub>O (20 ml). After filtration, THF (10 ml) was added to the filtrate and the filtrate was concentrated, compound **3** was isolated as red crystals. Yield: 0.36 g (55.2 %). Mp: 294.8 °C. Anal. Found: C, 46.33 ; H, 5.32 ; N, 3.36 Calcd. For C<sub>64</sub>H<sub>80</sub>Cu<sub>8</sub>N<sub>4</sub>P<sub>4</sub>S<sub>4</sub>: C, 46.14 ; H, 4.85 ; N, 3.36. <sup>1</sup>H NMR (C<sub>6</sub>D<sub>6</sub>, 25 °C): δ =

1.05-1.15 (m, 12H,  $\text{CHMe}_2$ ), 1.81-2.16 (m, 2H,  $\text{CHMe}_2$ ), 6.58 (d, 1H,  $J_{\text{H-H}} = 8$  Hz, Qu), 6.96 (t, 1H, Qu), 7.28 (d, 1H,  $J_{\text{H-H}} = 8$  Hz, Qu), 7.35 (t, 1H,  $J_{\text{H-H}} = 8$  Hz, Qu), 7.48 (t, 1H,  $J_{\text{H-H}} = 8$  Hz, Qu), 8.87 (d, 1H,  $J_{\text{H-H}} = 12$  Hz, Qu)  $^{13}\text{C}\{^1\text{H}\}$  NMR ( $\text{C}_6\text{D}_6$ , 25 °C):  $\delta = 18.9$  ( $\text{CHMe}_2$ ), 30.4 ( $\text{CHMe}_2$ ), 66.1 (CuCCu), 121.0, 122.3, 123.6, 126.8, 129.2, 133.6, 136.2, 147.7, 171.9 (Qu).  $^{31}\text{P}\{^1\text{H}\}$  NMR ( $\text{C}_6\text{D}_6$ , 25 °C):  $\delta = 61.7$ .

**X-ray crystallography.** Single crystals were sealed in Lindemann glass capillaries under nitrogen. X-ray data of **3** were collected on a Rigaku R-Axis II imaging plate using graphite-monochromatized Mo  $\text{K}\alpha$  radiation ( $\lambda = 0.71073$  Å) from a rotating-anode generator operating at 50kV and 90mA. The structures were solved by direct phase determination using the computer program SHELXTL-PC on a PC 486 and refined by full-matrix least squares with anisotropic thermal parameters for the non-hydrogen atoms.<sup>2</sup> Hydrogen atoms were introduced in their idealized positions and included in structure factor calculations with assigned isotropic temperature factor calculations.

**Table 1.** Crystallographic Data for Compound **3**

| <b>3</b>                                        |                                                                                              |
|-------------------------------------------------|----------------------------------------------------------------------------------------------|
| Formula                                         | C <sub>64</sub> H <sub>80</sub> Cu <sub>8</sub> N <sub>4</sub> P <sub>4</sub> S <sub>4</sub> |
| Fw                                              | 1665.76                                                                                      |
| Color                                           | Red                                                                                          |
| Cryst. Syst.                                    | Monoclinic                                                                                   |
| Space Group                                     | P2 <sub>1</sub> /c                                                                           |
| <i>a</i> (Å)                                    | 12.961(1)                                                                                    |
| <i>b</i> (Å)                                    | 12.923(1)                                                                                    |
| <i>c</i> (Å)                                    | 46.063(4)                                                                                    |
| <i>α</i> (deg)                                  | 90                                                                                           |
| <i>β</i> (deg)                                  | 90.277(2)                                                                                    |
| <i>γ</i> (deg)                                  | 90                                                                                           |
| <i>V</i> (Å <sup>3</sup> )                      | 7715.1(1)                                                                                    |
| <i>Z</i>                                        | 4                                                                                            |
| <i>d</i> <sub>calcd</sub> (g cm <sup>-3</sup> ) | 1.434                                                                                        |
| <i>μ</i> (mm <sup>-1</sup> )                    | 2.389                                                                                        |
| F(000)                                          | 3392                                                                                         |
| Cryst size (mm)                                 | 0.50 x 0.40 x 0.30                                                                           |
| 2 $\theta$ range (deg)                          | 0.88 to 25.25                                                                                |
| Index range                                     | -15 ≤ <i>h</i> ≤ 15,<br>-7 ≤ <i>k</i> ≤ 15,<br>-55 ≤ <i>l</i> ≤ 55                           |
| No. of rflns collected                          | 60540                                                                                        |
| No. of indep rflns                              | 13971                                                                                        |
| R1, wR2 ( <i>I</i> > 2( $\sigma$ ))             | 0.0401, 0.0962                                                                               |
| R1, wR2 (all data)                              | 0.0643, 0.1085                                                                               |
| Goodness of fit, <i>F</i> <sup>2</sup>          | 1.053                                                                                        |
| No. of data/restraints<br>/params               | 3135 / 0 / 181                                                                               |
| Largest diff peaks ,eÅ <sup>-3</sup>            | 0.724 to -0.521                                                                              |

**Table 1 Selected Bond Distances (Å) and Angles (deg) for Compound 3**

|                   |          |                   |          |
|-------------------|----------|-------------------|----------|
| Cu(1)-N(1)        | 1.974(6) | Cu(4)-Cu(6)       | 2.660(2) |
| Cu(1)-S(3)        | 2.302(2) | Cu(5)-C(10)       | 1.983(8) |
| Cu(1)-S(4)        | 2.338(2) | Cu(5)-C(42)       | 1.996(8) |
| Cu(1)-Cu(5)       | 2.632(1) | Cu(5)-Cu(7)       | 2.548(1) |
| Cu(1)-Cu(2)       | 2.667(1) | Cu(5)-Cu(8)       | 2.551(1) |
| Cu(1)-Cu(8)       | 2.673(2) | Cu(6)-C(26)       | 1.966(8) |
| Cu(2)-N(2)        | 1.966(6) | Cu(6)-C(58)       | 1.973(8) |
| Cu(2)-S(4)        | 2.306(2) | Cu(6)-Cu(8)       | 2.541(1) |
| Cu(2)-S(3)        | 2.348(2) | Cu(6)-Cu(7)       | 2.543(1) |
| Cu(2)-Cu(6)       | 2.637(2) | Cu(7)-C(26)       | 1.982(7) |
| Cu(2)-Cu(7)       | 2.667(2) | Cu(7)-C(42)       | 1.991(8) |
| Cu(3)-N(3)        | 1.964(7) | Cu(8)-C(58)       | 1.961(7) |
| Cu(3)-S(2)        | 2.310(3) | Cu(8)-C(10)       | 1.997(8) |
| Cu(3)-S(1)        | 2.322(3) | P(1)-C(10)        | 1.753(8) |
| Cu(3)-Cu(7)       | 2.638(2) | P(1)-S(1)         | 2.026(3) |
| Cu(3)-Cu(5)       | 2.648(2) | P(2)-C(26)        | 1.751(8) |
| Cu(3)-Cu(4)       | 2.703(2) | P(2)-S(2)         | 2.033(3) |
| Cu(4)-N(4)        | 1.949(7) | P(3)-C(42)        | 1.739(8) |
| Cu(4)-S(1)        | 2.315(3) | P(3)-S(3)         | 2.034(3) |
| Cu(4)-S(2)        | 2.329(2) | P(4)-C(58)        | 1.775(8) |
| Cu(4)-Cu(8)       | 2.632(1) | P(4)-S(4)         | 2.033(3) |
| N(1)-Cu(1)-S(3)   | 131.3(2) | Cu(7)-Cu(6)-Cu(2) | 61.9(4)  |
| N(1)-Cu(1)-S(4)   | 124.6(2) | C(26)-Cu(6)-Cu(4) | 107.0(2) |
| S(3)-Cu(1)-S(4)   | 93.6(8)  | C(58)-Cu(6)-Cu(4) | 76.6(2)  |
| N(1)-Cu(1)-Cu(5)  | 85.1(2)  | Cu(8)-Cu(6)-Cu(4) | 60.8(4)  |
| S(3)-Cu(1)-Cu(5)  | 90.6(7)  | Cu(7)-Cu(6)-Cu(4) | 92.2(4)  |
| S(3)-Cu(1)-Cu(2)  | 55.8(6)  | C(26)-Cu(7)-Cu(6) | 49.6(2)  |
| S(4)-Cu(1)-Cu(2)  | 54.4(6)  | C(42)-Cu(7)-Cu(5) | 50.4(2)  |
| Cu(5)-Cu(1)-Cu(2) | 90.4(4)  | Cu(6)-Cu(7)-Cu(5) | 90.4(4)  |
| N(1)-Cu(1)-Cu(8)  | 84.5(2)  | C(26)-Cu(7)-Cu(3) | 104.5(2) |
| S(3)-Cu(1)-Cu(8)  | 132.0(7) | C(42)-Cu(7)-Cu(3) | 77.8(2)  |
| S(4)-Cu(1)-Cu(8)  | 85.6(7)  | Cu(6)-Cu(7)-Cu(3) | 91.3(4)  |
| Cu(5)-Cu(1)-Cu(8) | 57.5(4)  | Cu(5)-Cu(7)-Cu(3) | 61.4(4)  |
| Cu(2)-Cu(1)-Cu(8) | 87.0(4)  | C(26)-Cu(7)-Cu(2) | 77.3(2)  |
| N(2)-Cu(2)-S(3)   | 125.8(2) | C(42)-Cu(7)-Cu(2) | 106.7(2) |

---

|                   |          |                   |          |
|-------------------|----------|-------------------|----------|
| N(2)-Cu(2)-S(4)   | 130.8(2) | Cu(6)-Cu(7)-Cu(2) | 60.8(4)  |
| S(4)-Cu(2)-S(3)   | 93.2(8)  | Cu(5)-Cu(7)-Cu(2) | 92.2(4)  |
| N(2)-Cu(2)-Cu(6)  | 84.7(2)  | C(58)-Cu(8)-Cu(6) | 50.0(2)  |
| S(3)-Cu(2)-Cu(6)  | 131.7(7) | C(10)-Cu(8)-Cu(5) | 49.9(2)  |
| S(4)-Cu(2)-Cu(6)  | 90.0(7)  | Cu(6)-Cu(8)-Cu(5) | 90.4(4)  |
| S(3)-Cu(2)-Cu(1)  | 54.2(6)  | C(58)-Cu(8)-Cu(4) | 77.4(2)  |
| S(4)-Cu(2)-Cu(1)  | 55.5(6)  | C(10)-Cu(8)-Cu(4) | 104.0(2) |
| Cu(6)-Cu(2)-Cu(1) | 90.3(5)  | Cu(6)-Cu(8)-Cu(4) | 61.9(4)  |
| N(2)-Cu(2)-Cu(7)  | 84.8(2)  | Cu(5)-Cu(8)-Cu(4) | 90.9(4)  |
| S(3)-Cu(2)-Cu(7)  | 86.2(7)  | C(58)-Cu(8)-Cu(1) | 107.7(2) |
| S(4)-Cu(2)-Cu(7)  | 131.4(7) | C(10)-Cu(8)-Cu(1) | 77.1(2)  |
| Cu(1)-Cu(2)-Cu(7) | 87.0(4)  | Cu(6)-Cu(8)-Cu(1) | 92.2(4)  |
| Cu(6)-Cu(2)-Cu(7) | 57.3(4)  | Cu(5)-Cu(8)-Cu(1) | 60.4(4)  |
| N(3)-Cu(3)-S(1)   | 128.0(2) | C(10)-P(1)-S(1)   | 111.6(3) |
| N(3)-Cu(3)-S(2)   | 129.3(2) | C(26)-P(2)-S(2)   | 110.6(3) |
| S(2)-Cu(3)-S(1)   | 92.7(9)  | C(42)-P(3)-S(3)   | 111.9(3) |
| N(3)-Cu(3)-Cu(7)  | 84.9(2)  | C(58)-P(4)-S(4)   | 111.0(3) |
| S(1)-Cu(3)-Cu(7)  | 131.2(8) | P(1)-S(1)-Cu(4)   | 106.6(1) |
| S(2)-Cu(3)-Cu(7)  | 88.8(7)  | P(1)-S(1)-Cu(3)   | 112.4(1) |
| N(3)-Cu(3)-Cu(5)  | 85.8(2)  | Cu(4)-S(1)-Cu(3)  | 71.3(8)  |
| S(1)-Cu(3)-Cu(5)  | 86.6(7)  | P(2)-S(2)-Cu(3)   | 107.7(1) |
| S(2)-Cu(3)-Cu(5)  | 131.0(8) | P(2)-S(2)-Cu(4)   | 112.7(1) |
| Cu(7)-Cu(3)-Cu(5) | 57.6(4)  | Cu(3)-S(2)-Cu(4)  | 71.3(7)  |
| S(1)-Cu(3)-Cu(4)  | 54.2(7)  | P(3)-S(3)-Cu(1)   | 106.8(1) |
| S(2)-Cu(3)-Cu(4)  | 54.7(7)  | P(3)-S(3)-Cu(2)   | 111.8(1) |
| Cu(5)-Cu(3)-Cu(4) | 87.4(5)  | Cu(1)-S(3)-Cu(2)  | 70.0(7)  |
| N(4)-Cu(4)-S(1)   | 130.2(2) | P(4)-S(4)-Cu(2)   | 107.0(1) |
| N(4)-Cu(4)-S(2)   | 127.8(2) | P(4)-S(4)-Cu(1)   | 112.8(1) |
| S(1)-Cu(4)-S(2)   | 92.3(9)  | Cu(2)-S(4)-Cu(1)  | 70.09(7) |
| N(4)-Cu(4)-Cu(8)  | 84.4(2)  | C(1)-N(1)-Cu(1)   | 116.9(5) |
| S(1)-Cu(4)-Cu(8)  | 89.8(7)  | C(17)-N(2)-Cu(2)  | 117.5(5) |
| S(2)-Cu(4)-Cu(8)  | 130.5(7) | C(33)-N(3)-Cu(3)  | 117.0(5) |
| N(4)-Cu(4)-Cu(6)  | 85.1(2)  | C(49)-N(4)-Cu(4)  | 118.4(5) |
| S(1)-Cu(4)-Cu(6)  | 131.3(8) | C(1)-C(10)-P(1)   | 121.9(6) |
| S(2)-Cu(4)-Cu(6)  | 86.0(7)  | C(1)-C(10)-Cu(5)  | 115.5(6) |
| Cu(8)-Cu(4)-Cu(6) | 57.4(4)  | P(1)-C(10)-Cu(5)  | 110.2(4) |
| S(1)-Cu(4)-Cu(3)  | 54.5(7)  | C(1)-C(10)-Cu(8)  | 112.5(6) |
| S(2)-Cu(4)-Cu(3)  | 54.0(7)  | P(1)-C(10)-Cu(8)  | 109.1(4) |

---

---

|                   |          |                   |          |
|-------------------|----------|-------------------|----------|
| Cu(6)-Cu(4)-Cu(3) | 87.4(5)  | Cu(5)-C(10)-Cu(8) | 79.7(3)  |
| Cu(8)-Cu(4)-Cu(3) | 89.3(5)  | C(17)-C(26)-P(2)  | 119.7(6) |
| C(42)-Cu(5)-Cu(7) | 50.2(2)  | C(17)-C(26)-Cu(6) | 114.7(5) |
| C(10)-Cu(5)-Cu(8) | 50.4(2)  | P(2)-C(26)-Cu(6)  | 110.9(4) |
| Cu(7)-Cu(5)-Cu(8) | 89.4(4)  | C(17)-C(26)-Cu(7) | 115.3(6) |
| C(10)-Cu(5)-Cu(1) | 78.4(2)  | P(2)-C(26)-Cu(7)  | 109.4(4) |
| C(42)-Cu(5)-Cu(1) | 103.1(2) | Cu(6)-C(26)-Cu(7) | 80.2(3)  |
| Cu(7)-Cu(5)-Cu(1) | 90.3(4)  | C(33)-C(42)-P(3)  | 120.6(6) |
| Cu(8)-Cu(5)-Cu(1) | 62.1(4)  | C(33)-C(42)-Cu(7) | 115.0(5) |
| C(10)-Cu(5)-Cu(3) | 107.0(2) | P(3)-C(42)-Cu(7)  | 110.1(4) |
| C(42)-Cu(5)-Cu(3) | 77.5(2)  | C(33)-C(42)-Cu(5) | 114.0(6) |
| Cu(7)-Cu(5)-Cu(3) | 61.0(4)  | P(3)-C(42)-Cu(5)  | 110.5(4) |
| Cu(8)-Cu(5)-Cu(3) | 92.3(4)  | Cu(7)-C(42)-Cu(5) | 79.4(3)  |
| C(58)-Cu(6)-Cu(8) | 49.6(2)  | C(49)-C(58)-P(4)  | 118.1(6) |
| C(26)-Cu(6)-Cu(7) | 50.2(2)  | C(49)-C(58)-Cu(8) | 117.2(6) |
| Cu(8)-Cu(6)-Cu(7) | 89.8(4)  | P(4)-C(58)-Cu(8)  | 109.6(4) |
| C(26)-Cu(6)-Cu(2) | 78.2(2)  | C(49)-C(58)-Cu(6) | 115.7(6) |
| C(58)-Cu(6)-Cu(2) | 104.0(2) | P(4)-C(58)-Cu(6)  | 109.8(4) |
| Cu(8)-Cu(6)-Cu(2) | 90.4(4)  | Cu(8)-C(58)-Cu(6) | 80.4(3)  |

---

### **Absorption spectrum of compound 3**

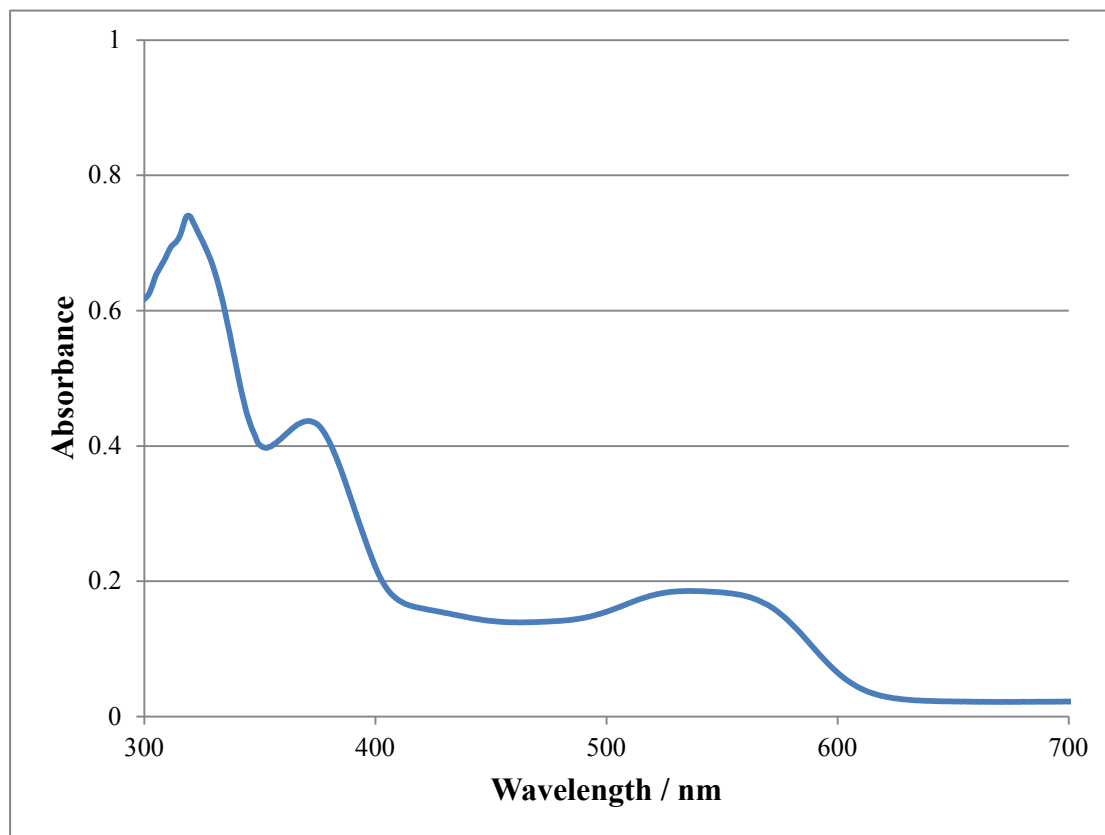

### **Emission spectrum of compound 3**

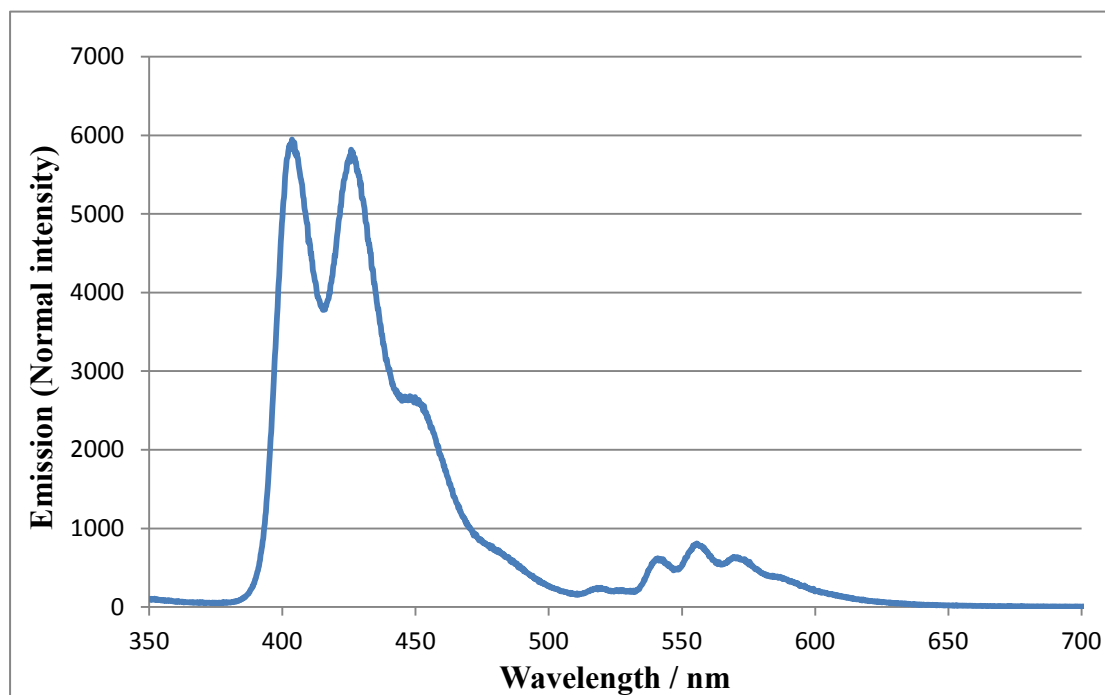



### **Excitation spectrum of compound 3**

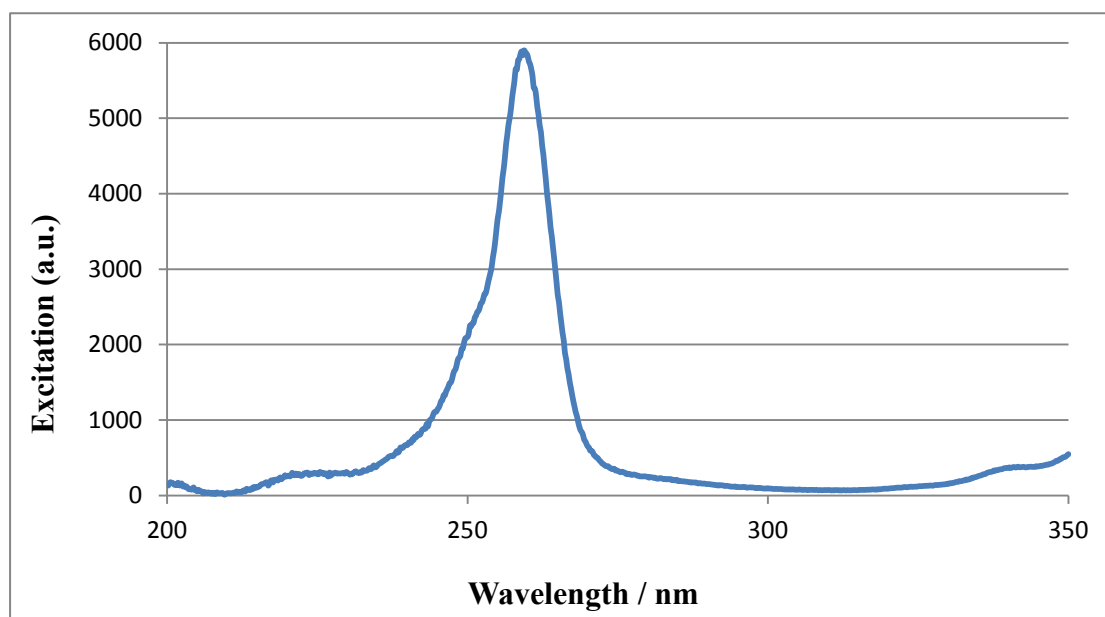

### **References:**

1. W.-P. Leung, Y.-C. Chan and T. C. W. Mak, *Organometallics*, 2013, **32**, 2584-2592.
2. G. M. Sheldrick, *SHELXL-97, Program for Crystal Structure Refinement*, University of Göttingen, Germany, 1997.
